# Supplementary material for: Cardiac Magnetic Resonance Left Ventricular Mechanical Uniformity Alterations for Risk Assessment After Acute Myocardial Infarction
Source: PubMed Central journal article supplement — J Am Heart Assoc. 2019 Aug 7;8(16):e011576. doi: 10.1161/JAHA.118.011576 (PMC6759895; doi:10.1161/jaha.118.011576), 2019-08-07
Supplement: JAH3-8-e011576-s001.pdf [file JAH3-8-e011576-s001.pdf]

# **Supplemental Material**

**Table S1. Predictors of MACE in patients with an ejection fraction >35% in a selected model including RURE.**

| Variable                   | Univariate       |          | Stepwise Multivariable |          |
|----------------------------|------------------|----------|------------------------|----------|
|                            | HR (95% CI)      | <i>p</i> | HR (95% CI)            | <i>p</i> |
| Age (years)                | 1.05 (1.02-1.08) | <0.001   | 1.04 (1.01-1.07)       | 0.006    |
| Male sex                   | 0.53 (0.30-0.96) | 0.035    | -                      | -        |
| Current smoking            | 0.46 (0.23-0.92) | 0.027    | -                      | -        |
| Diabetes mellitus          | 2.75 (1.55-4.86) | 0.001    | -                      | -        |
| Hypertension               | 2.14 (1.00-4.58) | 0.049    | -                      | -        |
| Killip class on admission  | 1.87 (1.33-2.63) | <0.001   | -                      | -        |
| Number of diseased vessels | 1.59 (1.13-2.24) | 0.009    | 1.61 (1.09-2.38)       | 0.016    |
| LV ejection fraction (%)   | 0.96 (0.92-0.99) | 0.013    | -                      | -        |
| Infarct size (% LV)        | 1.03 (1.00-1.05) | 0.029    | -                      | -        |
| CURE < 0.84 *              | 2.57 (1.41-4.68) | 0.002    | 1.99 (1.06-3.74)       | 0.034    |
| RURE < 0.75 *              | 1.44 (0.82-2.53) | 0.211    | -                      | -        |

\*The cutoffs for CURE and RURE are median values in the study population.

95% CI = confidence interval, CURE = circumferential uniformity ratio estimate, HR = hazard ratio, LV = left ventricular, % LV = percentage of left ventricular mass

**Table S2. Predictors of MACE in univariate and multivariable Cox regression analysis including uniformity ratio estimates as continuous variables.**

| Variable                         | Univariate       |          | Stepwise multivariable |          |
|----------------------------------|------------------|----------|------------------------|----------|
|                                  | HR (95% CI)      | <i>p</i> | HR (95% CI)            | <i>p</i> |
| Age (years)                      | 1.05 (1.03-1.07) | <0.001   | 1.04 (1.02-1.07)       | 0.002    |
| Male sex                         | 0.59 (0.37-0.96) | 0.032    | -                      | -        |
| Current smoking                  | 0.53 (0.31-0.90) | 0.018    | -                      | -        |
| Diabetes mellitus                | 1.93 (1.20-3.12) | 0.007    | -                      | -        |
| Hypertension                     | 2.36 (1.24-4.48) | 0.009    | -                      | -        |
| Killip class on admission        | 2.04 (1.61-2.58) | <0.001   | 1.47 (1.05-2.04)       | 0.024    |
| Number of diseased vessels       | 1.51 (1.15-2.00) | 0.004    | -                      | -        |
| LV ejection fraction (%)         | 0.94 (0.92-0.96) | <0.001   | 0.94 (0.92-0.97)       | <0.001   |
| Infarct size (% LV)              | 1.03 (1.01-1.05) | <0.001   | -                      | -        |
| Microvascular obstruction (% LV) | 1.09 (1.03-1.15) | 0.003    | -                      | -        |
| CURE (per 1 SD change)           | 0.67 (0.59-0.77) | <0.001   | -                      | -        |
| RURE (per 1 SD change)           | 0.66 (0.54-0.82) | <0.001   | -                      | -        |

95% CI = confidence interval, CURE = circumferential uniformity ratio estimate, HR = hazard ratio, LV = left ventricular, % LV = percentage of left ventricular mass, RURE = radial uniformity ratio estimate, SD = standard deviation

**Table S3. Predictors of MACE in patients with an ejection fraction >35% including uniformity ratio estimates as continuous variables.**

| Variable                   | Univariate       |          | Stepwise multivariable |          |
|----------------------------|------------------|----------|------------------------|----------|
|                            | HR (95% CI)      | <i>p</i> | HR (95% CI)            | <i>p</i> |
| Age (years)                | 1.05 (1.02-1.08) | <0.001   | 1.04 (1.01-1.07)       | 0.005    |
| Male sex                   | 0.53 (0.30-0.96) | 0.035    | -                      | -        |
| Current smoking            | 0.46 (0.23-0.92) | 0.027    | -                      | -        |
| Diabetes mellitus          | 2.75 (1.55-4.86) | 0.001    | -                      | -        |
| Hypertension               | 2.14 (1.00-4.58) | 0.049    | -                      | -        |
| Killip class on admission  | 1.87 (1.33-2.63) | <0.001   | -                      | -        |
| Number of diseased vessels | 1.59 (1.13-2.24) | 0.009    | 1.62 (1.10-2.39)       | 0.014    |
| LV ejection fraction (%)   | 0.96 (0.92-0.99) | 0.013    | -                      | -        |
| Infarct size (% LV)        | 1.03 (1.00-1.05) | 0.029    | -                      | -        |
| CURE (per 1 SD change)     | 0.71 (0.59-0.85) | <0.001   | 0.71 (0.54-0.92)       | 0.009    |

95% CI = confidence interval, CURE = circumferential uniformity ratio estimate, HR = hazard ratio, LV = left ventricular, % LV = percentage of left ventricular mass, SD = standard deviation

RURE per 1 standard deviation change was not significant in univariate analysis (HR 0.77, 95% CI 0.58-1.02; *p*=0.064) and therefore not included in the adjusted, multivariable model. A selected multivariable model with RURE did not change the overall results with age, number of diseased vessels, and CURE emerging as predictors of MACE.

**Figure S1. Correlation between CURE and RURE with left ventricular ejection fraction and infarct size.**

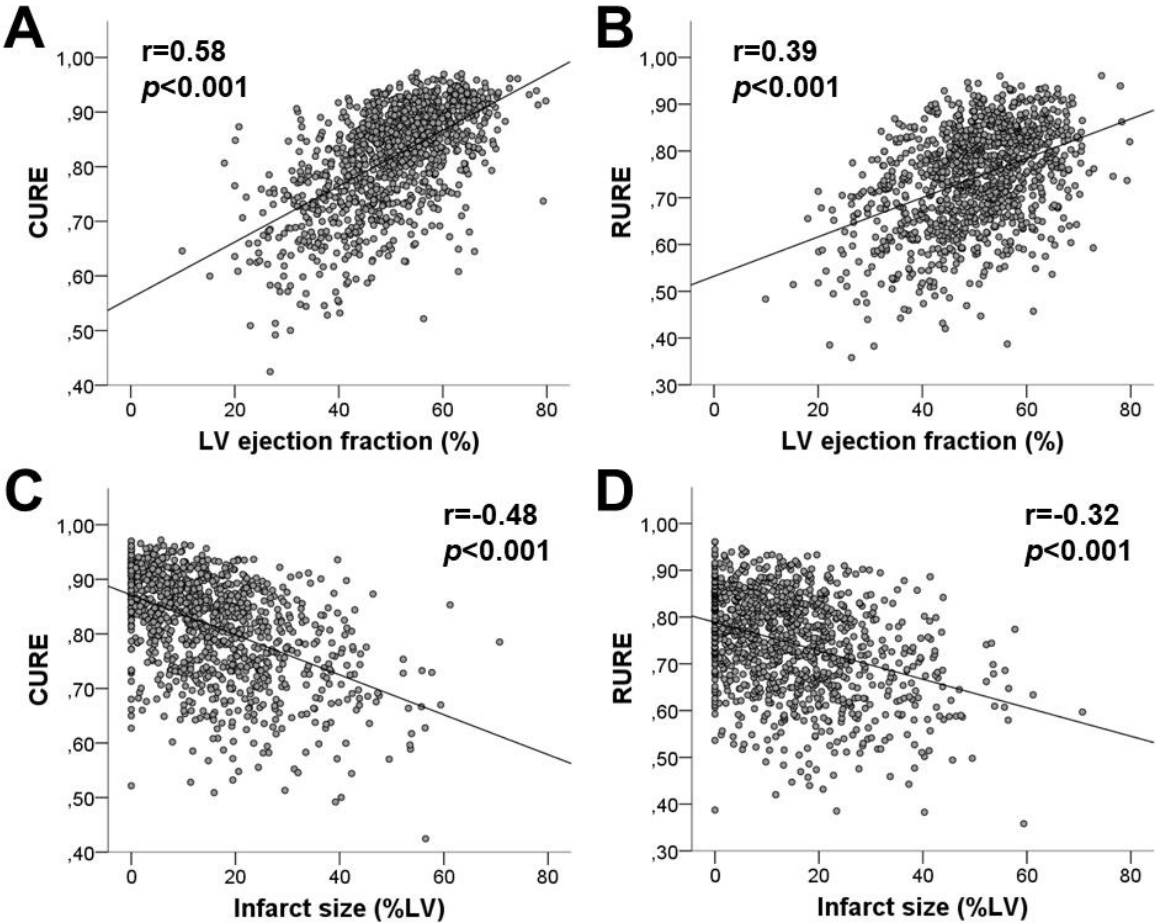

Uniformity ratio estimates correlated significantly with LV ejection fraction (A, B) and infarct size (C, D).

CURE = circumferential uniformity ratio estimate, LV = left ventricular; %LV = percentage of left ventricular mass; RURE = radial uniformity ratio estimate.

**Figure S2. Association of CURE and RURE with scar transmurality.**

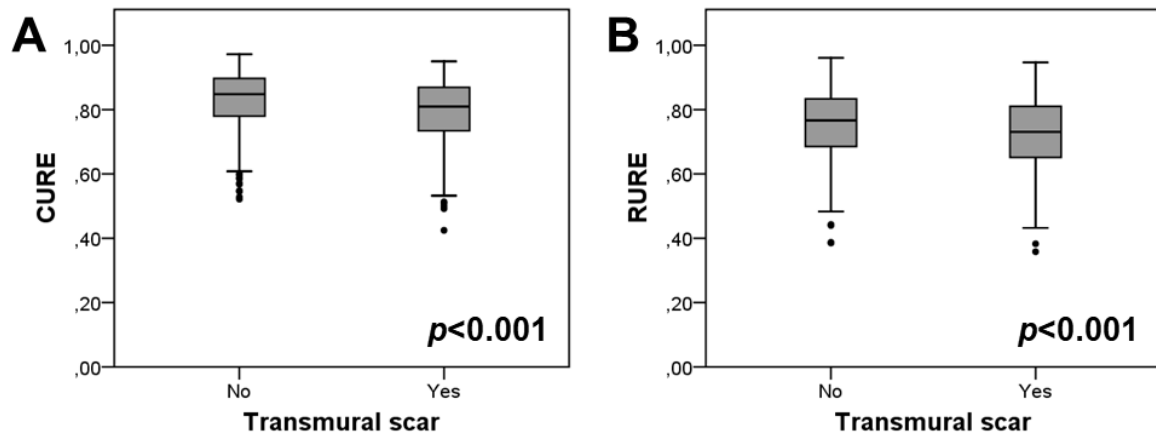

Patients with transmural infarction had significantly lower CURE (A) and RURE (B) compared to patients without transmural scars [CURE 0.81 (IQR 0.73 to 0.87) versus 0.85 (IQR 0.78 to 0.90),  $p < 0.001$ ; RURE 0.73 (IQR 0.65 to 0.81) versus 0.77 (IQR 0.69 to 0.83),  $p < 0.001$ ].

Uniformity ratio estimates are illustrated with Box (25<sup>th</sup> percentile, median, 75<sup>th</sup> percentile) and whisker (10<sup>th</sup> and 90<sup>th</sup> percentile) plots. P-values were calculated with the Mann-Whitney U test.

CURE = circumferential uniformity ratio estimate, IQR = interquartile range; RURE = radial uniformity ratio estimate.

**Figure S3. Association of CURE and RURE with the number of infarcted left ventricular segments.**

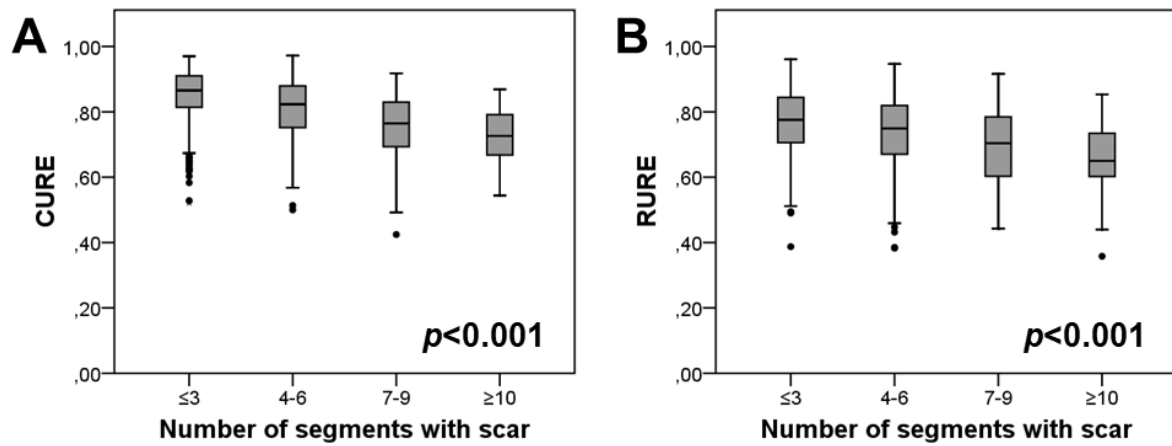

CURE (A) and RURE (B) decreased significantly with an increasing number of infarcted left ventricular segments.

Uniformity ratio estimates are illustrated with Box (25<sup>th</sup> percentile, median, 75<sup>th</sup> percentile) and whisker (10<sup>th</sup> and 90<sup>th</sup> percentile) plots. P-values were calculated with the Kruskal-Wallis test.

CURE = circumferential uniformity ratio estimate, RURE = radial uniformity ratio estimate.
